# Supplementary material for: Tropical Atlantic Climate and Ecosystem Regime Shifts during the Paleocene-Eocene Thermal Maximum
Source: Copernicus journal article supplement (doi:10.5194/cp-2017-76), 2017-06-20
Supplement: Supplementary file 1 [file Table 1.xlsx]

## Sheet: Sheet1
Species		Group/complex	Remarks
Achomosphaera sp.		Spiniferites cpx
Achomosphaera crassipellis		Spiniferites cpx
Adnatosphaeridium membraniphorum		Areoligera cpx
Adnatosphaeridium multispinosum		Areoligera cpx
Adnatosphaeridium sp.		Areoligera cpx
Apectodinium homomorphum		Apectodinium
Apectodinium hyperacantum		Apectodinium
Apectodinium paniculatum		Apectodinium
Apectodinium quinquelatum		Apectodinium
Apectodinium spp.		Apectodinium	specimens without processes observed
Apectodinium sumissum		Apectodinium
Areoligera senonensis		Areoligera cpx
Batiacasphaera compta
Carpatella sp. A cf. Crouch et al. 2003		Cordosphaeridium cpx
Cerebrocysta spp.
Cerodinium granulostriatum		Senegalinium cpx
Cerodinium sp.		Senegalinium cpx
Cerodinium speciosum		Senegalinium cpx
Cleistosphaeridium sp.
Cordosphaeridium fibrospinosum		Cordosphaeridium cpx
Cordosphaeridium multispinosum		Cordosphaeridium cpx
Cordosphaeridium sp.		Cordosphaeridium cpx
Cribroperidium guiseppei subsp. Major
Cribroperidinium sp.			reworked(?)
Dinogymnium spp.			reworked
Diphyes colligerum		Diphyes
Diphyes sp.		Diphyes
Eocladopyxis tesselata		Goniodomideae
Eocladopyxis peniculata		Goniodomideae
Eocladopyxis spp.		Goniodomideae
Elytrocysta sp.
Fibrocysta sp.		Cordosphaeridium cpx
Florentinia reichartii		Florentinia
Florentinia sp.		Florentinia
Glaphyrocysta cf. pastielsii		Areoligera cpx
Glaphyrocysta sp.		Areoligera cpx
Hafniasphaera septata		Spiniferites cpx
Heteraulacysta pustulata		Goniodomideae
Homotryblium abbreviatum		Goniodomideae
Homotryblium spp.		Goniodomideae
Homotryblium tenuispinosum		Goniodomideae
Hystricosphaeridium sp.			Genus within Goniodomideae but without epicystal archeopyle (not included in Goniodomideae)
Hystrichokolpoma bullatum
Hystrichokolpoma spp.
Hystrichokolpoma rigaudiae
Ifecysta sp.		Cordosphaeridium cpx
Ifecysta pachyderma		Cordosphaeridium cpx
Ifecysta lappacea		Cordosphaeridium cpx
Impagidinium cf. celinae		Impagidinium
Impagidinium cf. paradoxum		Impagidinium
Impagidinium crassimuratum		Impagidinium
Kallosphaeridium biornatum		Kallosphaeridium
Kallosphaeridium brevibarbatum		Kallosphaeridium
Kallosphaeridium nigeriaense		Kallosphaeridium
Kallosphaeridium orchiense		Kallosphaeridium
Kallosphaeridium spp.		Kallosphaeridium
Kallosphaeridium yorubaense		Kallosphaeridium
Kenleyia cpx.		Cordosphaeridium cpx
Lanternosphaeridium lanosum		Cordosphaeridium cpx
Lejeunecysta beninensis		Protoperinioideae
Lejeunecysta cf. lata		Protoperinioideae
Lingulodinium spp.		Lingulodinium
Muratodinium fimbriatum		Cordosphaeridium cpx
Operculodinium sp.		Operculodinium
Paleocystodinium sp.		Protoperinioideae
Phelodinium magnificum		Protoperinioideae
Phthanoperidinium sp.		Senegalinium cpx
Polysphaeridium subtile		Goniodomideae
Pyxidinopsis sp.
Senegalinium sp.		Senegalinium cpx
Spinifirites mirabilis		Spiniferites cpx
Spinifirites pseudofurcatus		Spiniferites cpx
Spinifirites spp.		Spiniferites cpx
cf. Spiniferella		Spiniferites cpx
Thalassiphora sp.		Cordosphaeridium cpx
Trichodinium spp.
Wilsonidium pechoricum		Apectodinium cpx	Very difficult to separate from bold Apectodinium
Wilsonidium tessalatum		Apectodinium cpx
Dinocyst INDET			Indeterminable dinocysts
General remarks	The species that are not grouped have very few occurrences.
